# Supplementary material for: New Insights on the Progesterone (P4) and PGRMC1/NENF Complex Interactions in Colorectal Cancer Progression
Source: MDPI journal article supplement (doi:10.3390/cancers15205074), 2023-10-20
Supplement: s1 [file s1]

## SUPPLEMENTAL DATA

**Title:** New insights on the progesterone (P4) and PGRMC1/NENF complex interactions in colorectal cancer progression

**Table S1.** Progesterone (P4) receptors characteristics regarding different clinicopathological parameters in colorectal cancer (CRC) patients.

| Authors                  | Material/Method                                                                                                                                                                                                                      | Type of P4 receptor | Results                                                                                                                                                                                                                                                                                                                                                                                                                                 |
|--------------------------|--------------------------------------------------------------------------------------------------------------------------------------------------------------------------------------------------------------------------------------|---------------------|-----------------------------------------------------------------------------------------------------------------------------------------------------------------------------------------------------------------------------------------------------------------------------------------------------------------------------------------------------------------------------------------------------------------------------------------|
| Kaklamanos et al., 1999  | colorectal adenocarcinoma tissues (n=65)/IHC                                                                                                                                                                                         | PR                  | <ul style="list-style-type: none"> <li>- PR expression was found in 23% (15/65) of CRC samples.</li> <li>- PR expression was higher in women as compared to men.</li> <li>- PR-positive expression was associated with a higher WHO grade.</li> <li>- PR-positive expression was associated with a significantly shorter 5-year survival rate as compared to PR-negative samples.</li> </ul>                                            |
| Zavarhei et al., 2007    | primary colorectal adenocarcinoma tissues and matched NM tissues (n=83)/IHC                                                                                                                                                          | PGR                 | <ul style="list-style-type: none"> <li>- PGR expression was found in 59% (49/83) of CRC tissues and 15.6% (13/83) of NM tissues.</li> <li>- PGR-negative expression was significantly associated with larger tumor size, higher Duke stage, and increased presence of secondary metastasis.</li> </ul>                                                                                                                                  |
| Qasim et al., 2011       | colorectal adenoma tissues (n=33), colorectal adenocarcinoma tissues (n=33), non-tumorous colonic tissues (n=20)/IHC                                                                                                                 | PR                  | <ul style="list-style-type: none"> <li>- PR expression gradually increased from normal mucosa (10%; 2/20) through adenoma (24.24%; 8/33) to adenocarcinoma (36.36%; 12/33).</li> <li>- The 3-digital IHC parameters (A, N, I) were also significantly increasing from normal mucosa through adenoma to adenocarcinoma.</li> </ul>                                                                                                       |
| Liu, 2016                | Datasets with the PR pathway activity data for colorectal adenoma, CRC, and normal colorectal mucosa (GSE20916, GSE37364, GSE17536, GSE39582, GSE14333, GSE17537, GSE33113, GSE12945, GSE44861)/gene signature-based BinReg approach | PR                  | <ul style="list-style-type: none"> <li>- The PR pathway activity was significantly lower in CRC and adenoma tissues compared to normal colorectal mucosa.</li> <li>- Higher PR pathway activity was significantly associated with lower WHO grade and longer disease-free survival.</li> <li>- PR pathway activity was not associated with CRC location, tumor grade, microsatellite stability phenotype, and patient's age.</li> </ul> |
| Silverstein et al., 2019 | WHO IV grade CRC tissues of women diagnosed during the peripartum period and matched NM tissues (n=5)/IHC                                                                                                                            | PR                  | <ul style="list-style-type: none"> <li>- One CRC tissue showed weak (1%) nuclear PR expression.</li> <li>- All normal tissues were PR-negative.</li> </ul>                                                                                                                                                                                                                                                                              |
| Ye et al., 2019          | non-metastatic CRC tissues (n=148)/IHC                                                                                                                                                                                               | PR                  | <ul style="list-style-type: none"> <li>- The score of PR expression was low in 78.4% (116/148) of CRC patients.</li> <li>- PR expression was not associated with the patient's overall survival, local relapse-free survival, and distant metastasis-free survival.</li> </ul>                                                                                                                                                          |
| ElLateef et al., 2020    | colorectal adenocarcinoma tissues (n=30)/IHC                                                                                                                                                                                         | PR                  | <ul style="list-style-type: none"> <li>- 76.67% (23/30) of CRC samples showed cytoplasmic PR expression from weak through moderate to strong. 23.33% (7/30) of CRC samples were PR-negative.</li> <li>- PR-positive expression was significantly associated with higher cumulative progression-free survival.</li> </ul>                                                                                                                |

|                    |                        |     |                                                                                                                                                                                                                                 |
|--------------------|------------------------|-----|---------------------------------------------------------------------------------------------------------------------------------------------------------------------------------------------------------------------------------|
|                    |                        |     | - PR expression was not related to the T stage, grades of the investigated tumors, and nodal metastasis.                                                                                                                        |
| Zhang et al., 2021 | CRC tissues (n=77)/IHC | PGR | - PGR expression was high in 60% (49/77) of CRC tissues.<br>- High levels of PGR expression were associated with lower tumor size, tumor differentiation, vascular invasion, tumor stage, and longer short-term survival times. |

**Legend for Table S1:** A, area; BinReg, Bayesian binary regression; CRC, colorectal cancer; DMFS, distant metastasis-free survival; I, intensity; IHC, immunohistochemical staining; n, number of cases; N, number of objects; NM, normal mucosa; PGR/PR, progesterone receptor; WHO, World Health Organization.

**Table S2.** Sequences of primers used in the q-RT-PCR.

| Gene                          | Primer sequence (5'-3')   | The product size (base pairs) | EMBL accession number |
|-------------------------------|---------------------------|-------------------------------|-----------------------|
| <i>PPIA</i> *                 | F:GCCAAGACTGAGTGGTTGGATG  | 144                           | NM_021130.4           |
|                               | R:GAGTTGTCCACAGTCAGCAATGG |                               |                       |
| <i>PGR</i>                    | F: GAGCACTGGATGCTGTTGCT   | 66                            | NM_001202474.3        |
|                               | R: GGCTTAGGGCTTGGCTTTC    |                               |                       |
| <i>mPR<math>\alpha</math></i> | F: TGCCCTGCTGTGTGATCTTA   | 113                           | NM_178422.5           |
|                               | R: ATAGCTGAGGCTCCTGGATG   |                               |                       |
| <i>mPR<math>\beta</math></i>  | F: CGGTTGCATACCCTGTCCTG   | 152                           | NM_133367.4           |
|                               | R: ATCTTGGAAGCCCATCCTC    |                               |                       |
| <i>mPR<math>\gamma</math></i> | F: ATTGTCCCAAGGCCTCAGAT   | 108                           | NM_001104554.1        |
|                               | R: ATGCCATTCCAGTCAAATCC   |                               |                       |
| <i>PGRMC1</i>                 | F: TGCCTGGATAAGGAAGCACT   | 120                           | NM_006667.4           |
|                               | R: GCCCACGTGATGATACTTGA   |                               |                       |
| <i>PGRMC2</i>                 | F: ATGGGAAAGTCTTCGACGTG   | 106                           | NM_006320.4           |
|                               | R: CAAAATGTGGCCAGTCCTCT   |                               |                       |
| <i>SERBP1</i>                 | F: AGGACCGACAAGTCAAGTGC   | 106                           | NM_001018067.2        |
|                               | R: CACAAAGGAACCAGGGTTGT   |                               |                       |
| <i>NENF</i>                   | F: AGGGGTAGCCAAGATGTCCT   | 149                           | NM_013349             |
|                               | R: GAATTCTCCGGGCAGTGTAG   |                               |                       |
| <i>CXCL8</i>                  | F: ACCACACTGCGCCAACAC     | 101                           | NM_000584.4           |
|                               | R: ACTTCTCCACAACCCTCTGC   |                               |                       |
| <i>CXCR1</i>                  | F: AGGTCCTGGGAAATGACACA   | 121                           | NM_000634.3           |
|                               | R: AGTGTACGCAGGGTGAATCC   |                               |                       |

\* The reference gene (housekeeping gene)

**Legend for Table S2:** mPR $\alpha$ , membrane progesterone receptor alfa; mPR $\beta$ , membrane progesterone receptor beta; mPR $\gamma$ , membrane progesterone receptor gamma; NENF, neudesin; PGR, classical progesterone receptor; PGRMC1, progesterone receptor membrane component 1; PGRMC2, progesterone receptor membrane component 2; PPIA, peptidylprolyl isomerase A; SERBP1, SERPINE1 mRNA binding protein.

**Table S3.** Diagnostic usefulness of serum NENF evaluation in differentiating colorectal cancer patients from healthy individuals.

|                     | <b>Cut-off</b> | <b>Youden index</b> | <b>AUC <math>\pm</math> SE</b> | <b>Se [%]</b> | <b>Sp [%]</b> | <b>PPV [%]</b> | <b>NPV [%]</b> | <b>ACC [%]</b> | <b>2-tailed <i>p</i>-value</b> |
|---------------------|----------------|---------------------|--------------------------------|---------------|---------------|----------------|----------------|----------------|--------------------------------|
| <b>NENF [ng/ml]</b> | 2.97           | 0.30                | 0.676 $\pm$ 0.079              | 83            | 47            | 81             | 50             | 73             | 0.026                          |

**Legend for Table S3:** ACC, diagnostic accuracy; AUC, the area under the ROC curve; Cut-off (based on the highest Youden index); NPV, negative predictive value; PPV, positive predictive value; SE, standard error; Se, diagnostic sensitivity; Sp, diagnostic specificity.

Figure S1

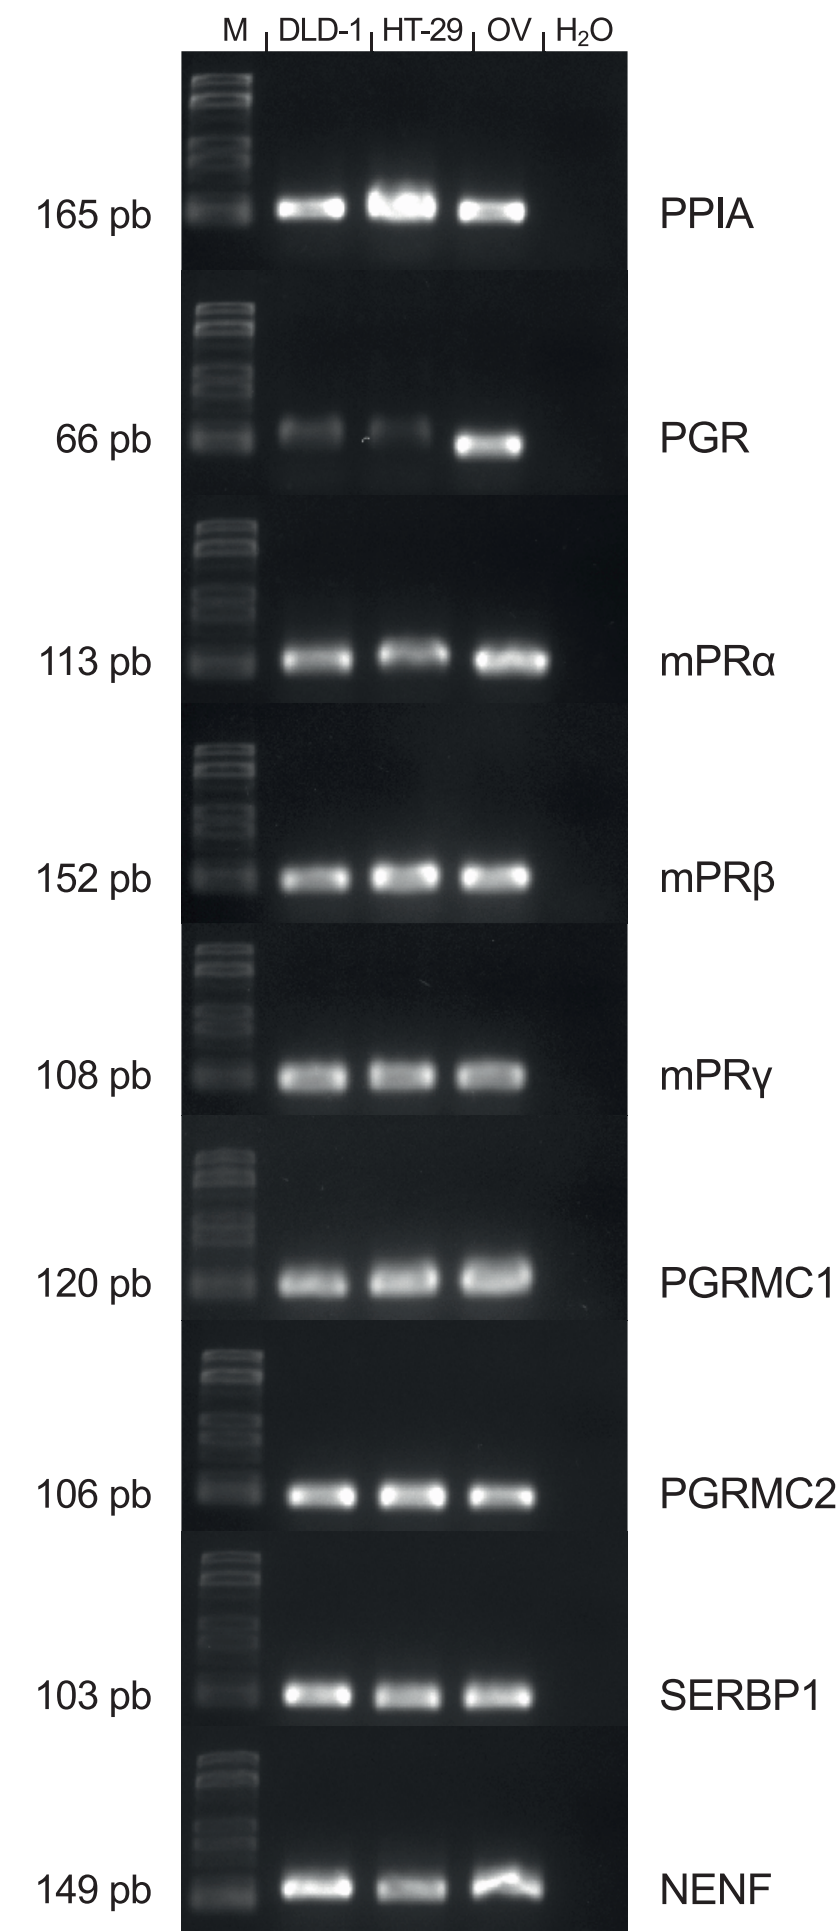

Figure S2

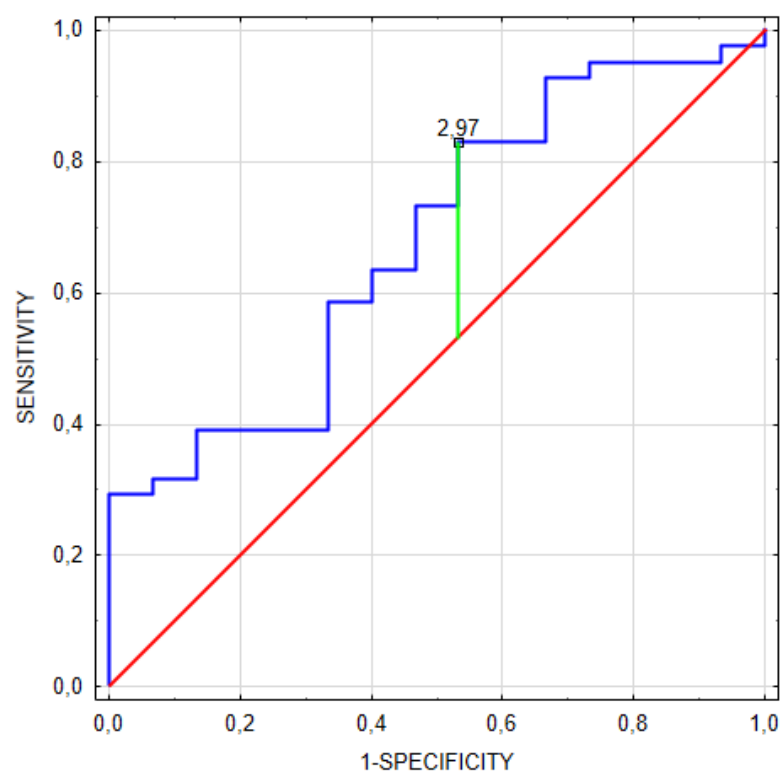

**Figure S1. Characterization of progesterone receptors and NENF expression profiles in DLD-1 and HT-29 cell lines.** The RT-PCR analysis in 2% agarose gel of housekeeping *PPIA*, *PGR*, *mPR $\alpha$* , *mPR $\beta$* , *mPR $\gamma$* , *PGRMC1*, *PGRMC2*, *SERBP1* and *NENF* in DLD-1 and HT-29 cell lines. Amplicons' size is presented on the left. CRC, colorectal cancer; H<sub>2</sub>O, nuclease-free water; M, marker; *mPR $\alpha$* , membrane progesterone receptor alfa; *mPR $\beta$* , membrane progesterone receptor beta; *mPR $\gamma$* , membrane progesterone receptor gamma; *NENF*, neudesin; OV, ovary; P4, progesterone; *PGR*, classical progesterone receptor; *PGRMC1*, progesterone receptor membrane component 1; *PGRMC2*, progesterone receptor membrane component 2; *PPIA*, peptidylprolyl isomerase A; *SERBP1*, SERPINE1 mRNA binding protein.

**Figure S2.** The area under the ROC curve (AUC) to distinguish between colorectal cancer patients and healthy individuals based on serum NENF levels.

AUC = 0.676 for serum NENF; cut-off = 2.97 ng/ml.
